# Supplementary material for: PYR/PYL/RCAR family members are major in-vivo ABI1 protein phosphatase 2C-interacting proteins in Arabidopsis
Source: PubMed Central journal article supplement (PMC2807913; doi:10.1111/j.1365-313x.2009.04054.x), 2009-11-09
Supplement: NIHMS152710-supplement-Supp_Fig_s1_-_s5.pdf [file NIHMS152710-supplement-Supp_Fig_s1_-_s5.pdf]

(a)

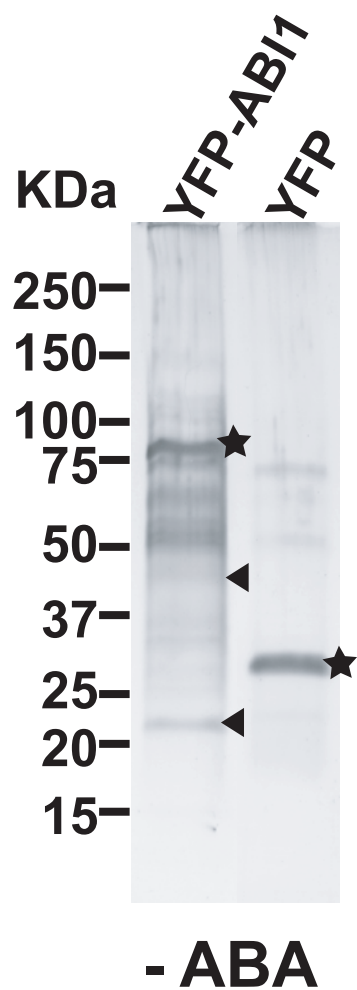

(b)

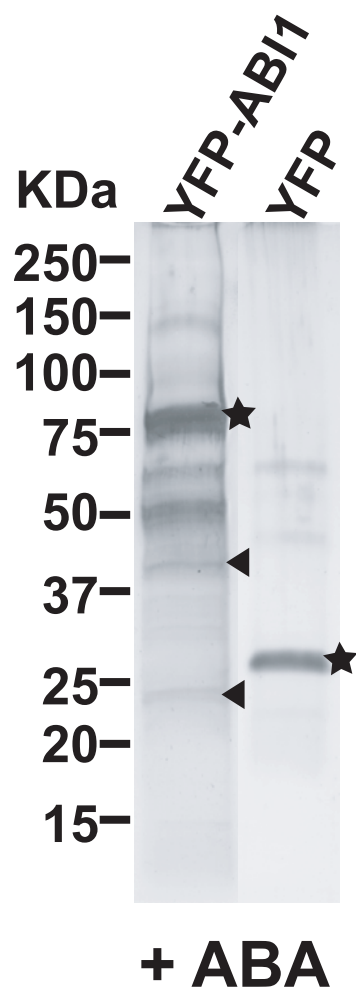

Figure. S1 Nishimura et al.

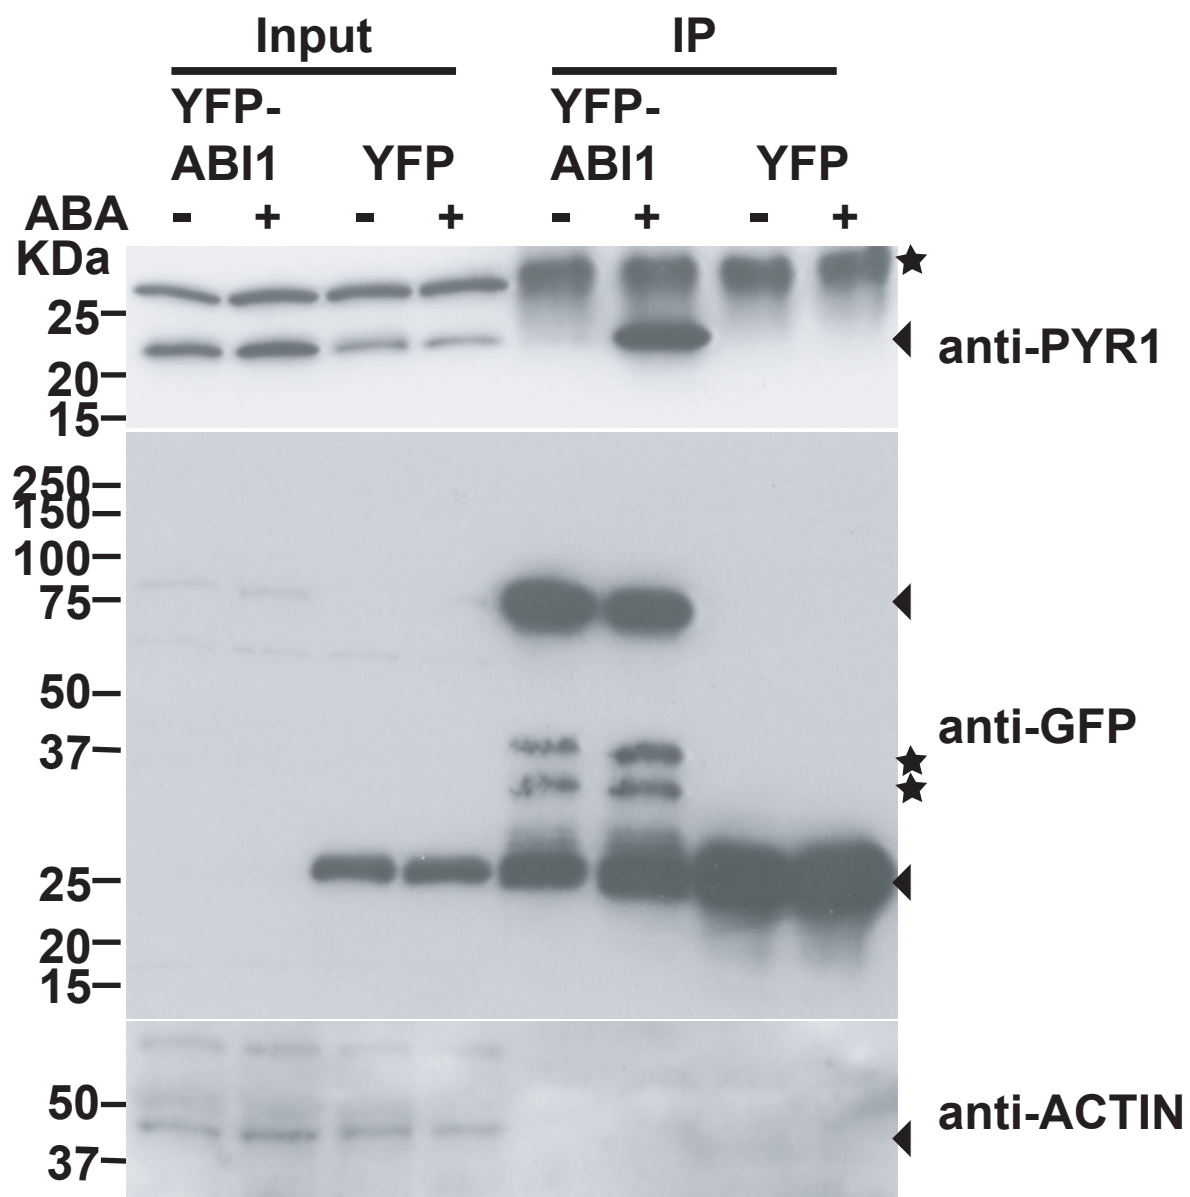

Figure. S2 Nishimura et al.

(a)

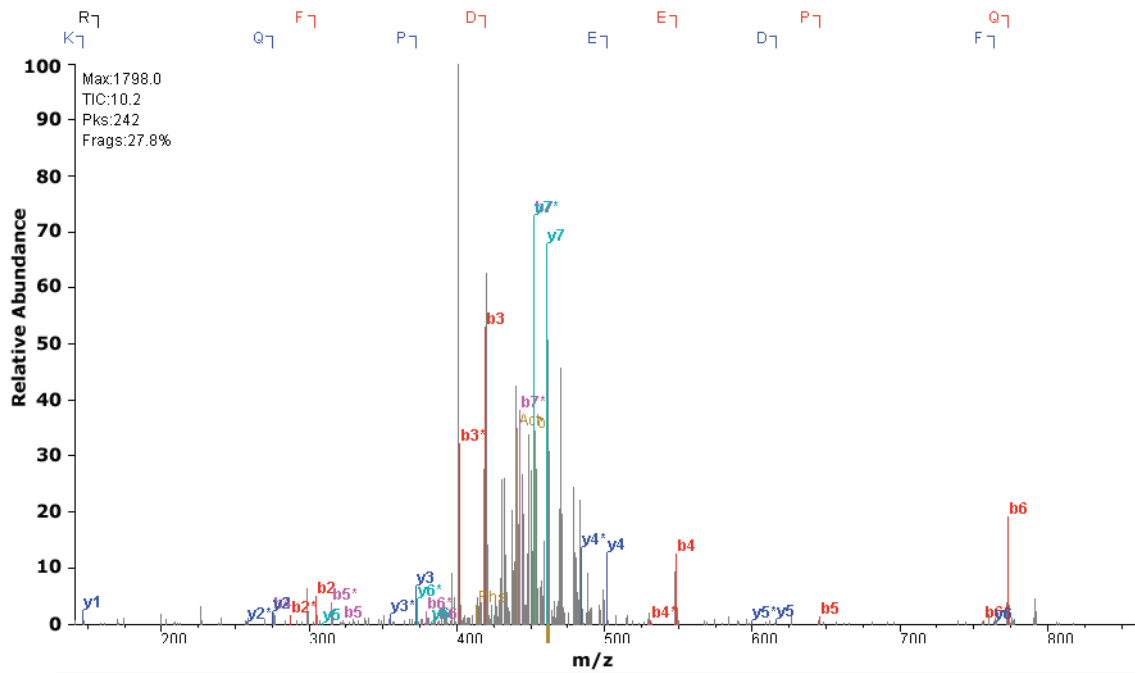

(b)

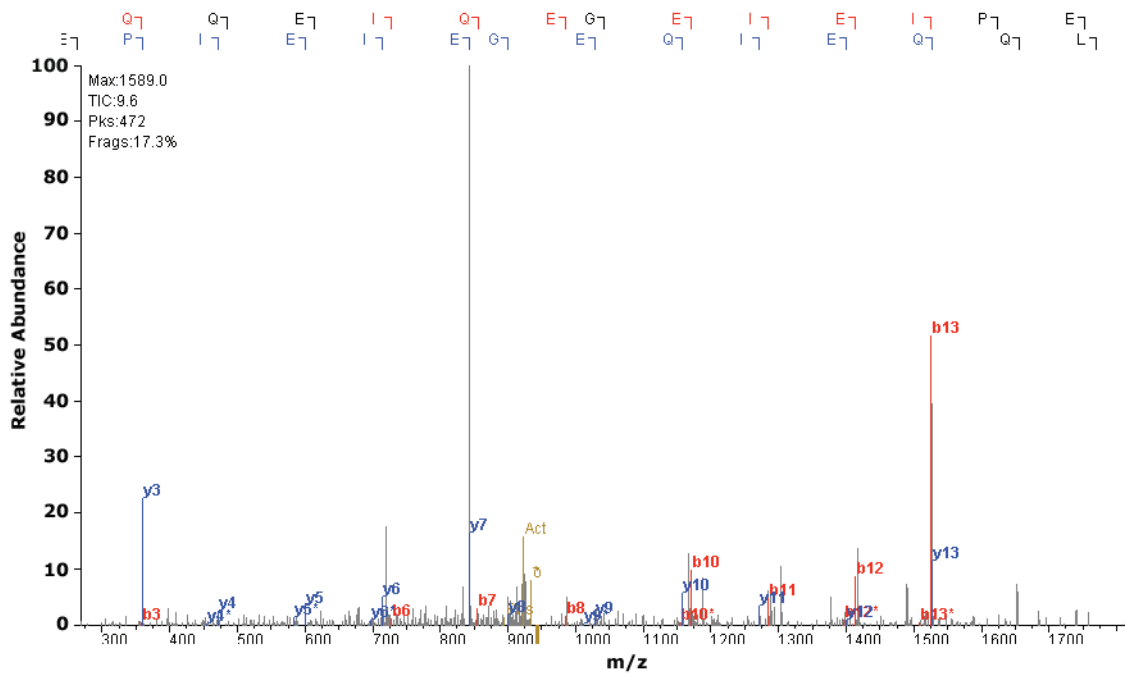

Figure S3 Nishimura et al.

(a)

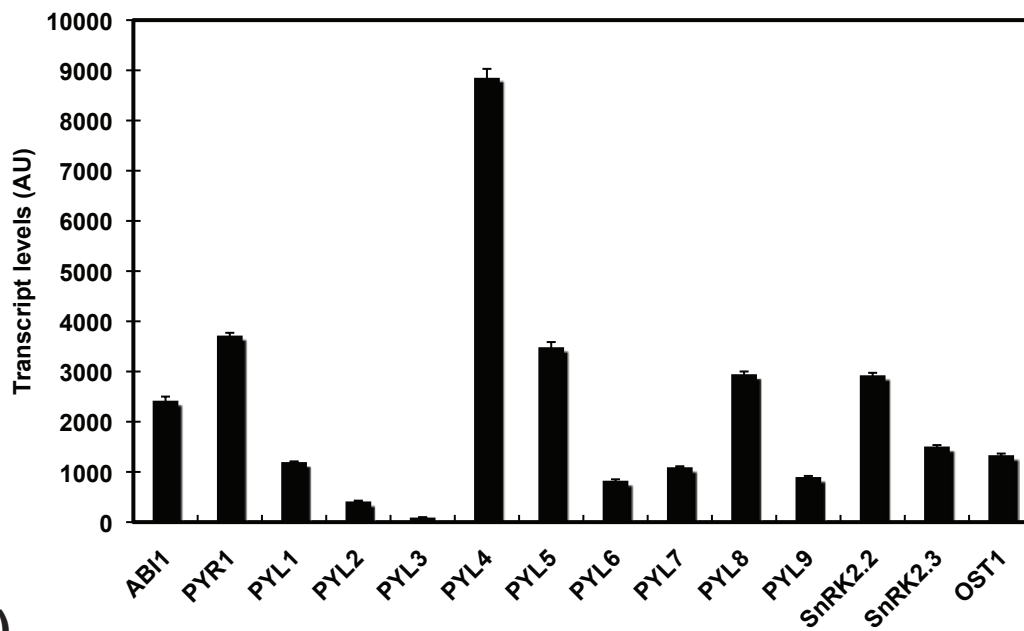

(b)

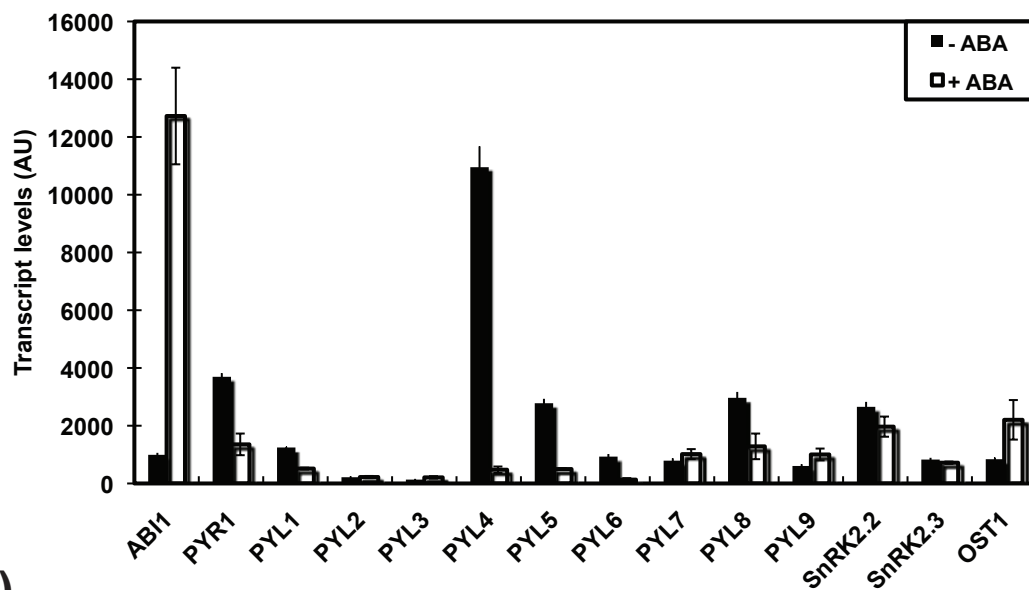

(c)

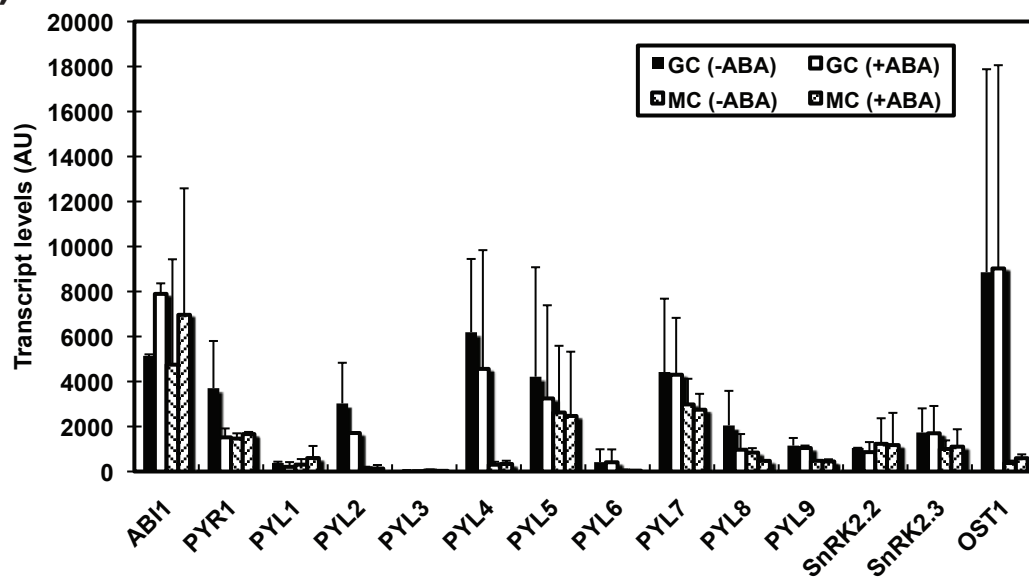

Figure S4 Nishimura et al.

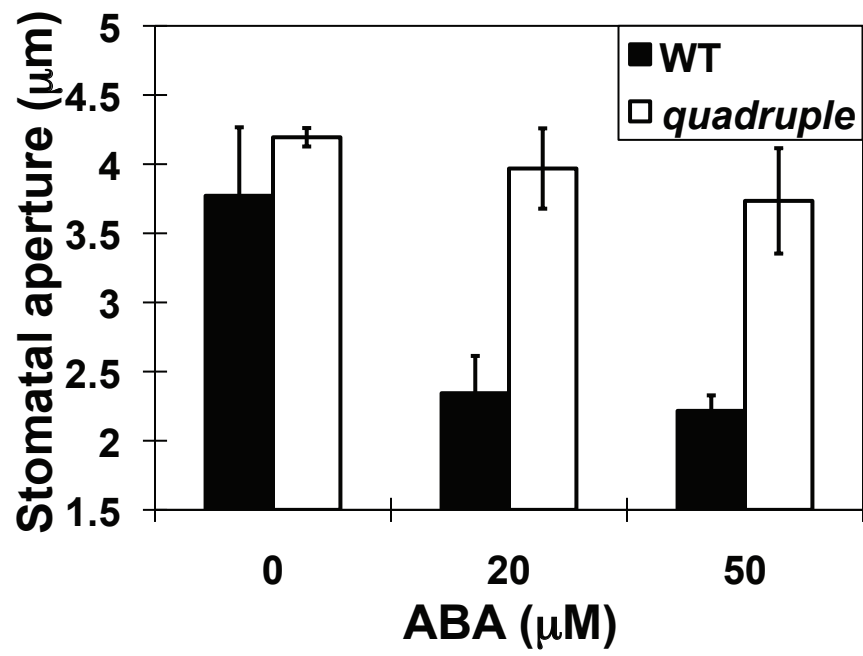

Figure S5 Nishimura et al.
